# Supplementary figures and images for: Genetic Diversity and Possible Origins of the Hepatitis B Virus in Siberian Natives
Source: Preprints.org preprint supplement (doi:10.20944/preprints202210.0031.v1), 2022-10-05

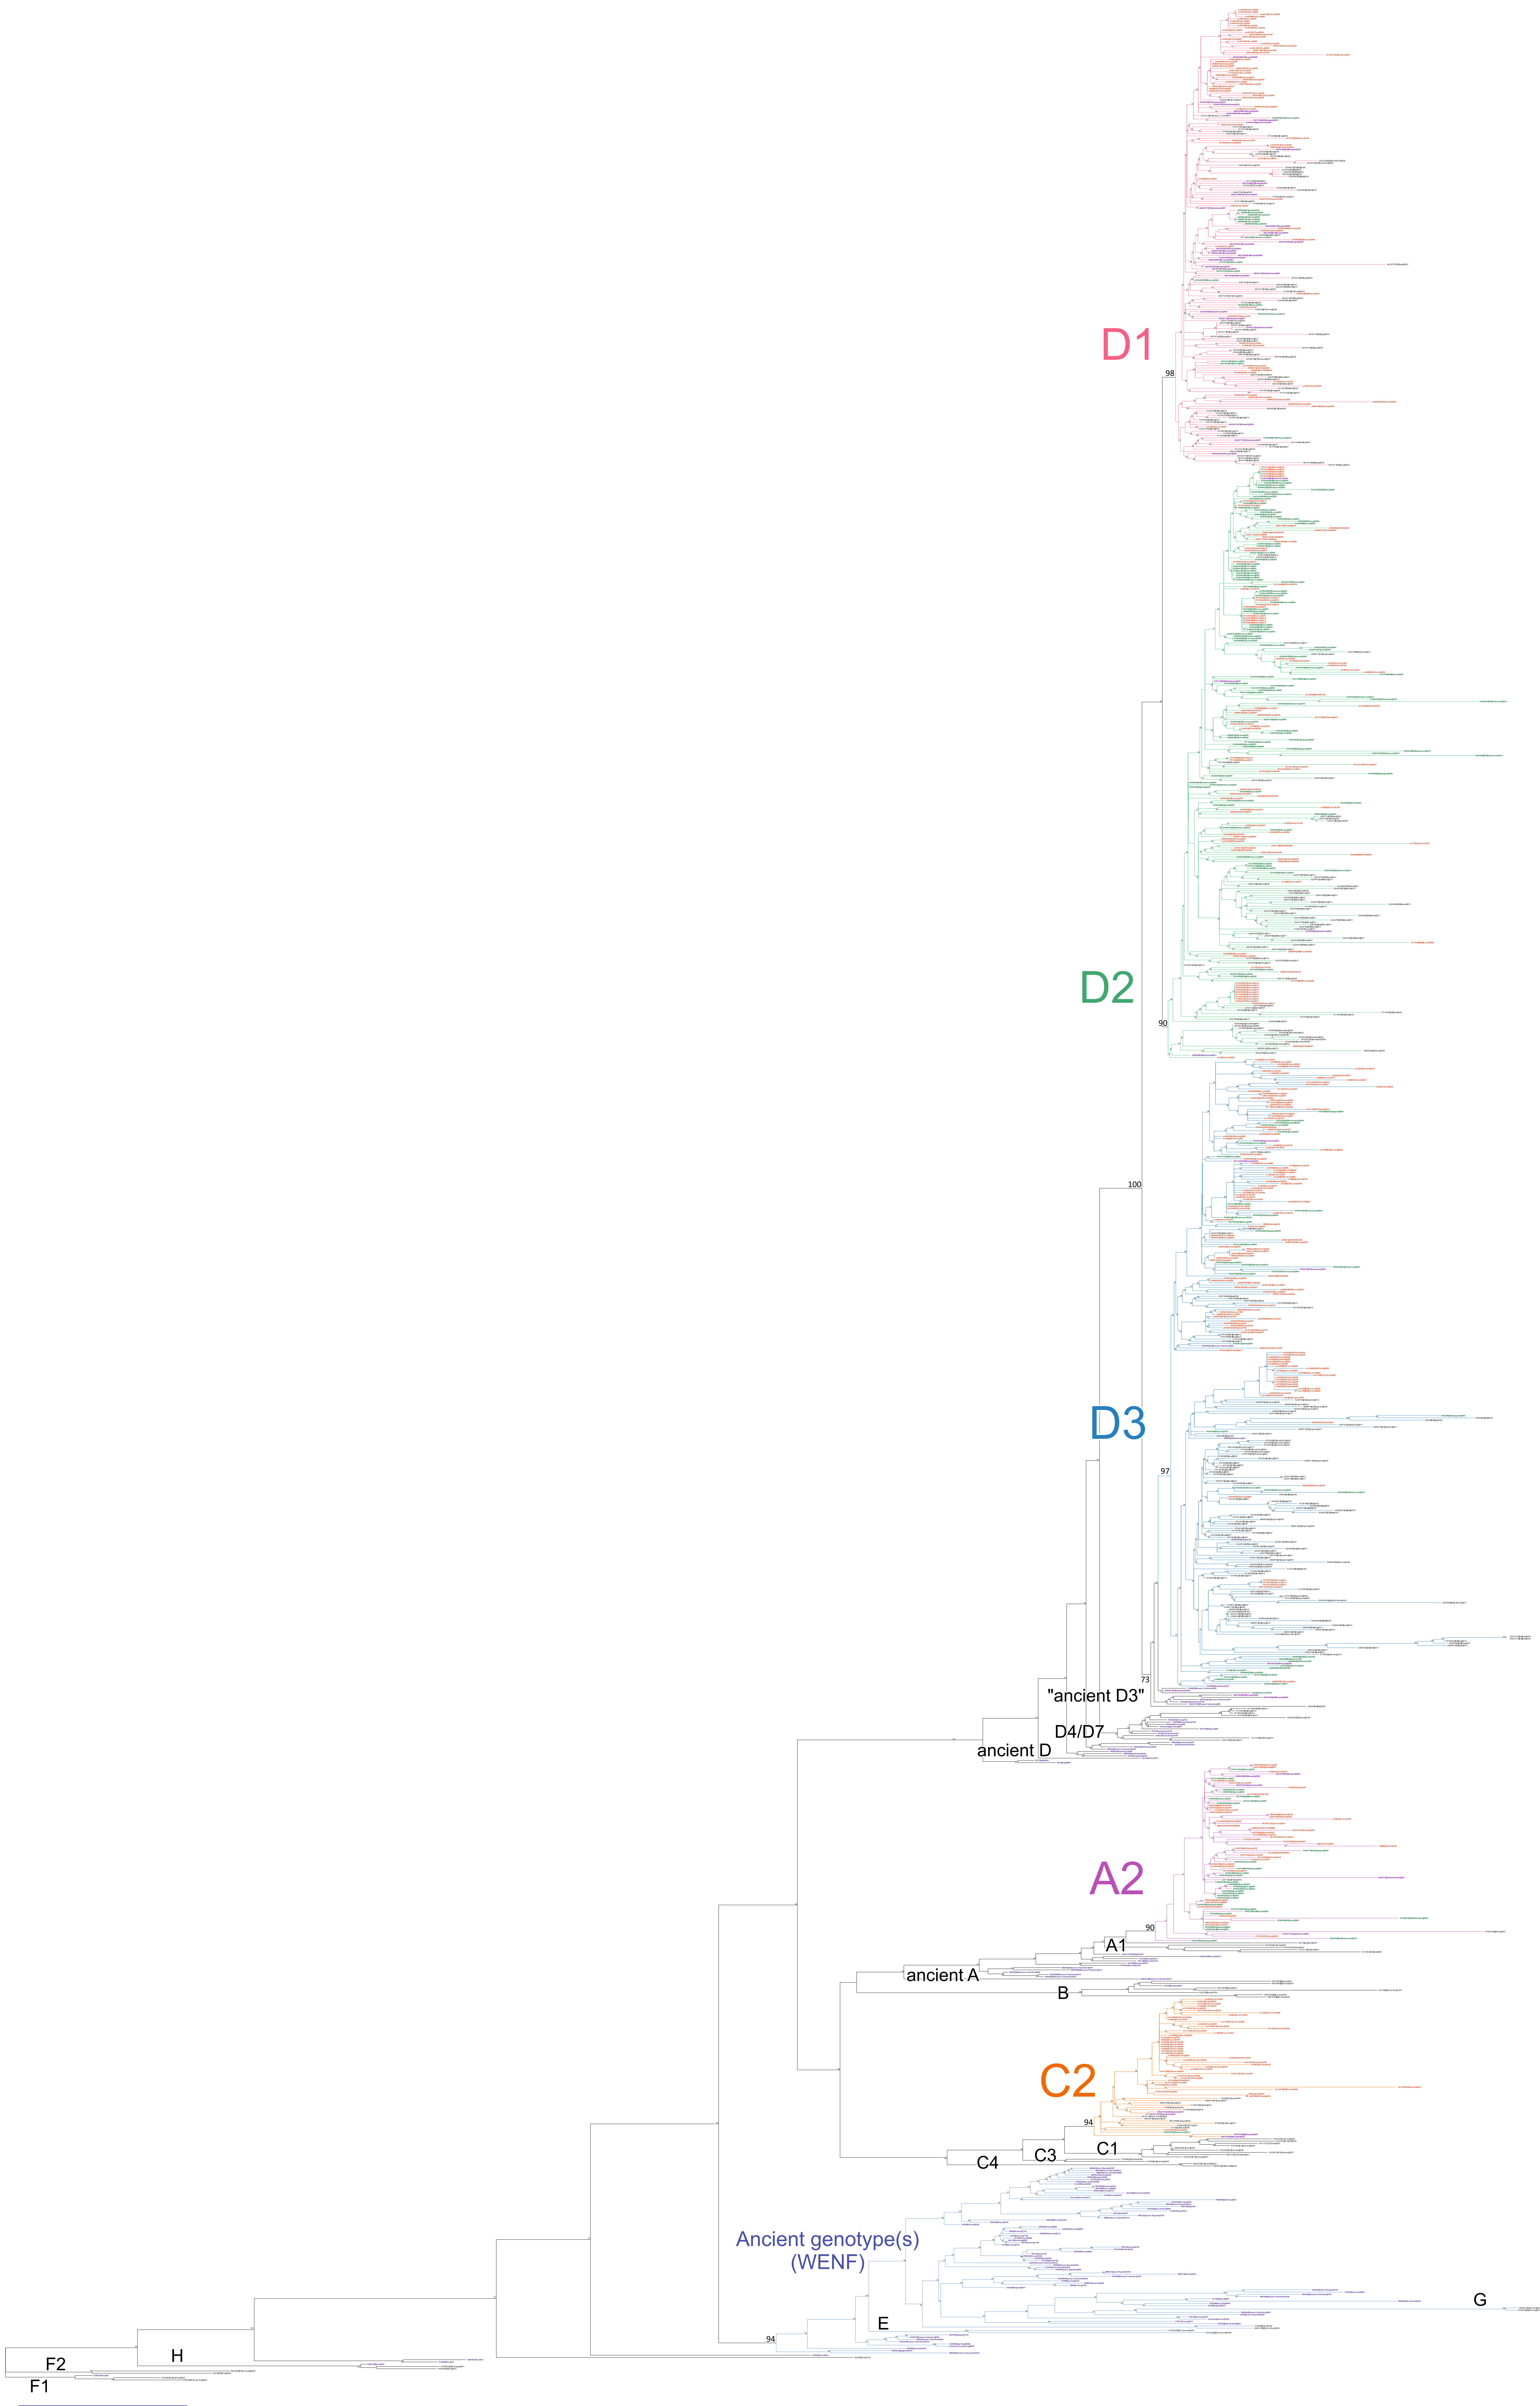

Supplement: Supplementary file 1 [file supplementary]
